# Supplementary material for: Assessment of Artificial Neural Network through Drought Indices
Source: MDPI journal article supplement (doi:10.3390/eng4010003), 2022-12-25
Supplement: s1 [file s1]

Archive with 1 entries (1 files):
- eng-2086486-Supplementary.pdf
