# Supplementary figures and images for: Assessment of Artificial Neural Network through Drought Indices
Source: MDPI journal article supplement (doi:10.3390/eng4010003), 2022-12-25

## Monthly Climatology across UK for 53 years (1969-2021)

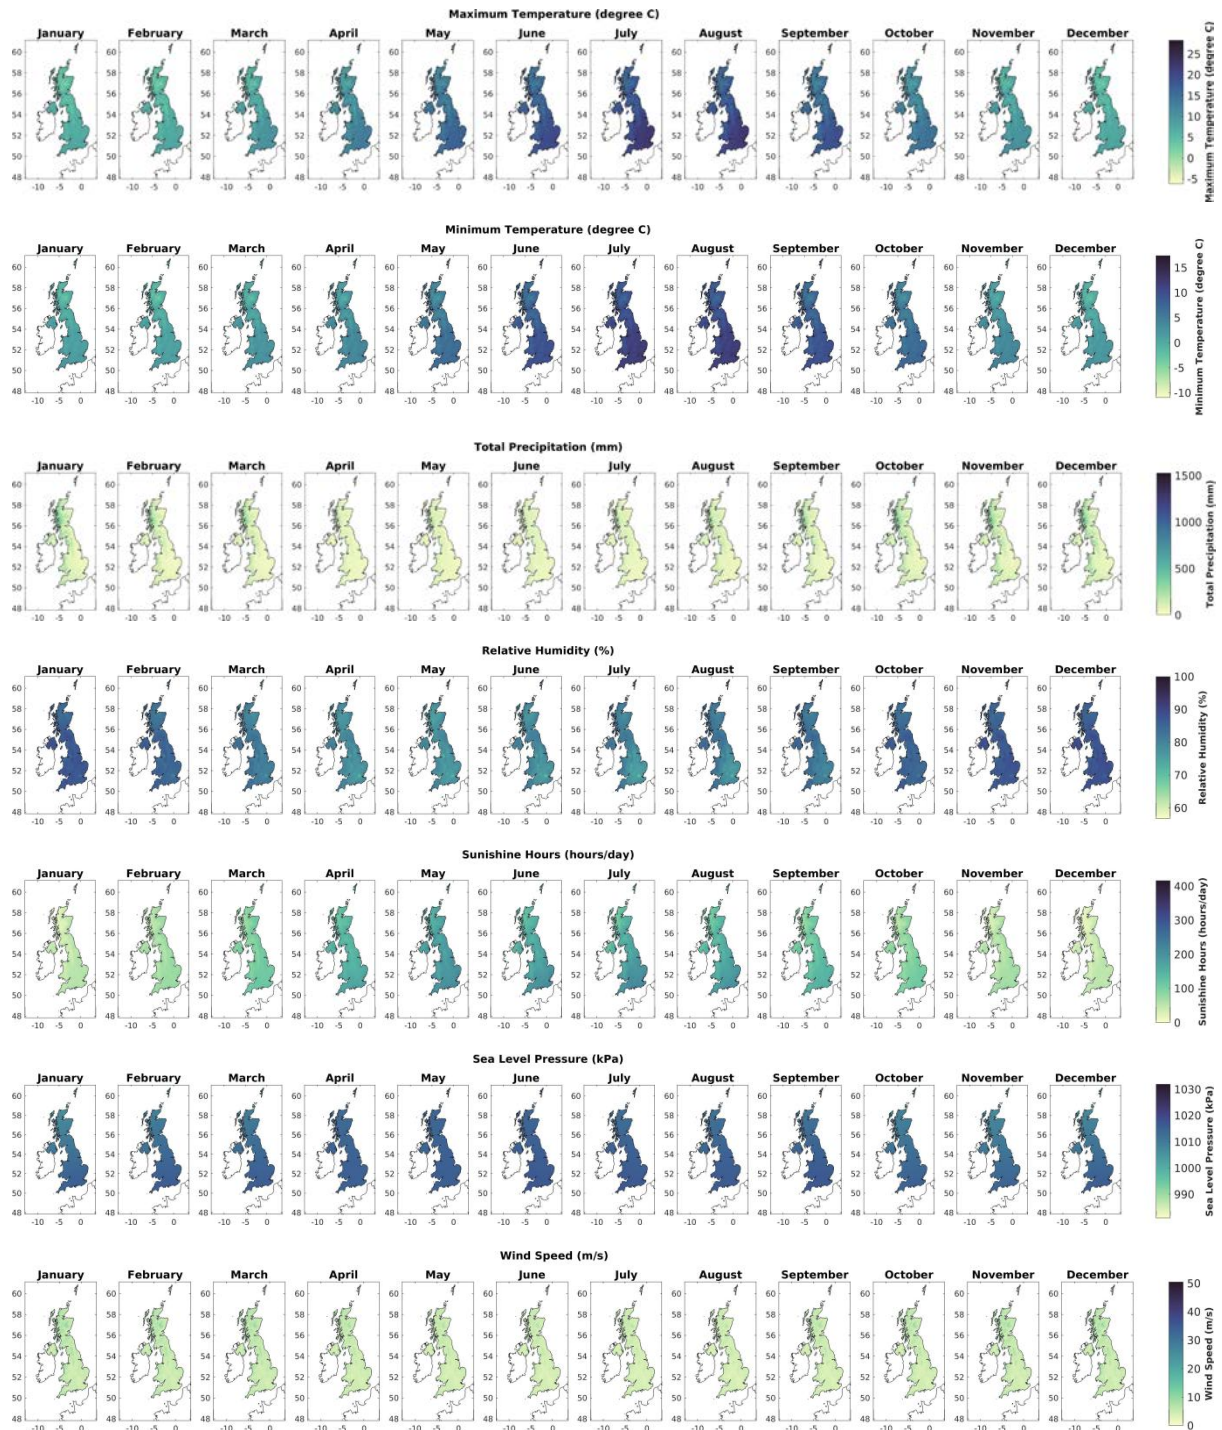

Supplement: s1 [file s1]
